# Supplementary material for: Changes in the surface broadband shortwave radiation budget during the 2017 eclipse
Source: Copernicus journal article supplement (doi:10.5194/acp-20-10477-2020), 2020-09-09
Supplement: Supplementary file 1 [file acp-20-10477-2020-supplement.zip]

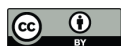

*Supplement of*

## **Changes in the surface broadband shortwave radiation budget during the 2017 eclipse**

**Guoyong Wen et al.**

*Correspondence to:* Guoyong Wen ([guoyong.wen@nasa.gov](mailto:guoyong.wen@nasa.gov))

- [acp-20-10477-2020-supplement-title-page.pdf](#)
- [PSP\\_Eclipse\\_Casper.dat](#)
- [PSP\\_Eclipse\\_Columbia.dat](#)
- [README.pdf](#)
- [TSE2017-Casper-60s.txt](#)
- [TSE2017-Columbia-60s.txt](#)
- [TotalOpticalDepth\\_Casper.dat](#)
- [TotalOpticalDepth\\_Columbia.dat](#)

The copyright of individual parts of the supplement might differ from the CC BY 4.0 License.
