# Supplementary material for: Changes in the surface broadband shortwave radiation budget during the 2017 eclipse
Source: Copernicus journal article supplement (doi:10.5194/acp-20-10477-2020), 2020-09-09
Supplement: Supplementary file 2 [file acp-20-10477-2020-supplement.zip]

TSE2017-Casper-60s.txt – the eclipse parameters at Casper calculated by Fred Espenak (Mr. Eclipse)  
TSE2017-Columbia-60s.txt – the eclipse parameters at Columbia calculated by Fred Espenak (Mr. Eclipse)  
PSP\_Eclipse\_Casper.dat - the pyronometer observed surface broadband observed at Casper  
PSP\_Eclipse\_Columbia.dat - the pyronometer observed surface broadband observed at Columbia  
TotalOpticalDepth\_Casper.dat – Pandora spectrometer retrieved total optical depth at Casper  
TotalOpticalDepth\_Columbia.dat – Pandora spectrometer retrieved total optical depth at Columbia
